# Supplementary material for: Chemodosimetric cyanide sensing in a 5,15-porphodimethene Pd(ii) complex
Source: Royal Society of Chemistry journal article supplement (doi:10.1039/c4cc04775c), 2014-01-01
Supplement: c4cc04775c1.pdf [file c4cc04775c1.pdf]

## **ELECTRONIC SUPPLEMENTARY INFORMATION**

### **Chemodosimetric cyanide sensing in 5,15-Porphodimethene Pd(II) Complex**

**M. G. Derry Holaday,<sup>a</sup> Gourav Tarafdar,<sup>b</sup> B. Adinarayana,<sup>b</sup> M. L. P. Reddy,<sup>c</sup>  
and A. Srinivasan<sup>\*b</sup>**

<sup>a</sup>*Photosciences and Photonics Section, <sup>c</sup>Inorganic Chemistry Section, Chemical Sciences and Technology Division, CSIR-National Institute for Interdisciplinary Science and Technology (NIIST), Trivandrum 695 019, Kerala, India.*

<sup>b</sup>*School of Chemical Sciences, National Institute of Science Education and Research, IOP Campus, Sainik School – P. O. Bhubaneswar – 751 005, Odisha, India. E-mail: srini@niser.ac.in*

#### **Table of contents:**

|                                                                   |   |          |
|-------------------------------------------------------------------|---|----------|
| 1. Materials and methods                                          | : | S2       |
| 2. <sup>1</sup> H NMR titrations of <b>1</b> with CN <sup>-</sup> | : | S3       |
| 3. Absorption spectral analyses of <b>1</b> with CN <sup>-</sup>  | : | S4 – S7  |
| 4. ESI-MS spectra of [ <b>1</b> .CN] <sup>-</sup> adduct          | : | S8       |
| 5. Single Crystal X-ray structure of <b>1</b>                     | : | S9 – S11 |
| 6. Crystal data for <b>1</b>                                      | : | S12      |

## 1. Materials and methods

The reagents and materials for synthesis were used as obtained from Sigma - Aldrich chemical suppliers. All solvents were purified and dried by standard methods prior to use. NMR solvents were used as received. The NMR spectra were recorded with Bruker 400 MHz spectrometer with TMS as internal standard. ESI mass spectra were recorded on Bruker, microTOF-QII mass spectrometer. FAB mass spectra were obtained on a JEOL SX-120/DA6000 spectrometer using argon (6 KV, 10 mA) as the FAB gas. Electronic absorption spectra were recorded with Perkin Elmer – Lambda 750 UV-Visible spectrophotometer and data analyses were done using the UV-winlab software package. The irradiation experiment was performed with Newport, 1918-C model, Xenon source with 135 W power supply. X-ray quality crystal for **1** was grown by the slow diffusion of hexane over CH<sub>2</sub>Cl<sub>2</sub> solution of the metal complex similarly slow diffusion of hexane over CH<sub>3</sub>CN solution of the metal complex yielded the polymorph of **1**. Single-crystal X-ray diffraction data of **1** were collected on a Bruker KAPPA APEX-II, four angle rotation system, MoK $\alpha$  radiation (0.71073 Å). All experiments were carried out at room temperature (25  $\pm$  1 °C), unless otherwise mentioned.

## 2. $^1\text{H}$ NMR titrations of **1** with $\text{CN}^-$

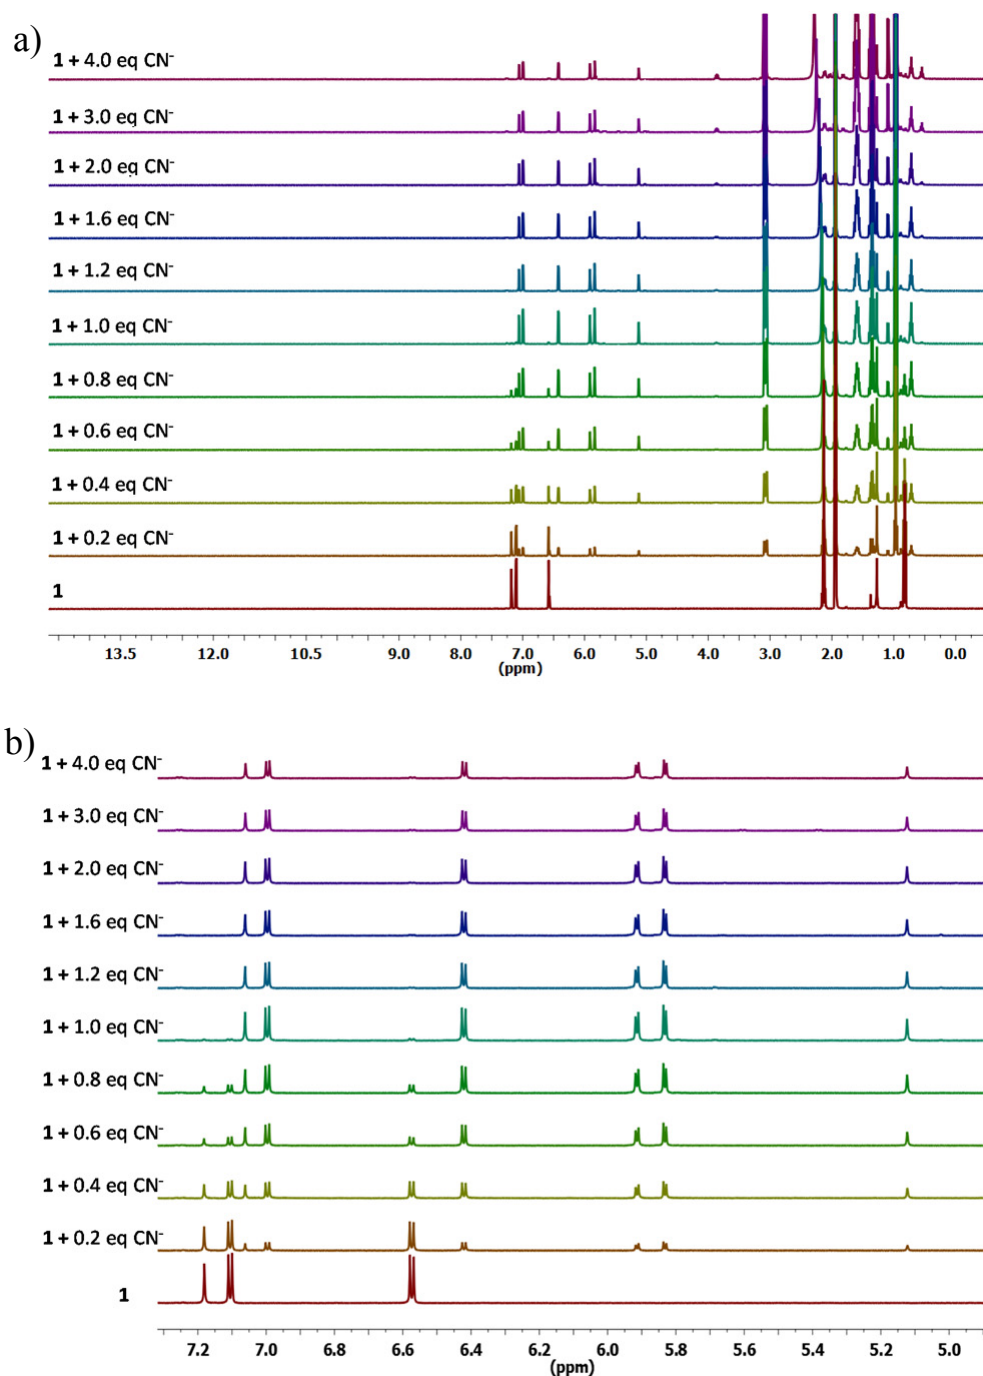

**Figure S1.** (a)  $^1\text{H}$  NMR titrations of **1** in  $\text{CD}_3\text{CN}$  upon increasing concentration of tetrabutylammonium cyanide (TBACN) in  $\text{CD}_3\text{CN}$ . (b) Expansion from 5.0 to 7.2 ppm.

### 3. Absorption spectral analyses of **1** with $\text{CN}^-$

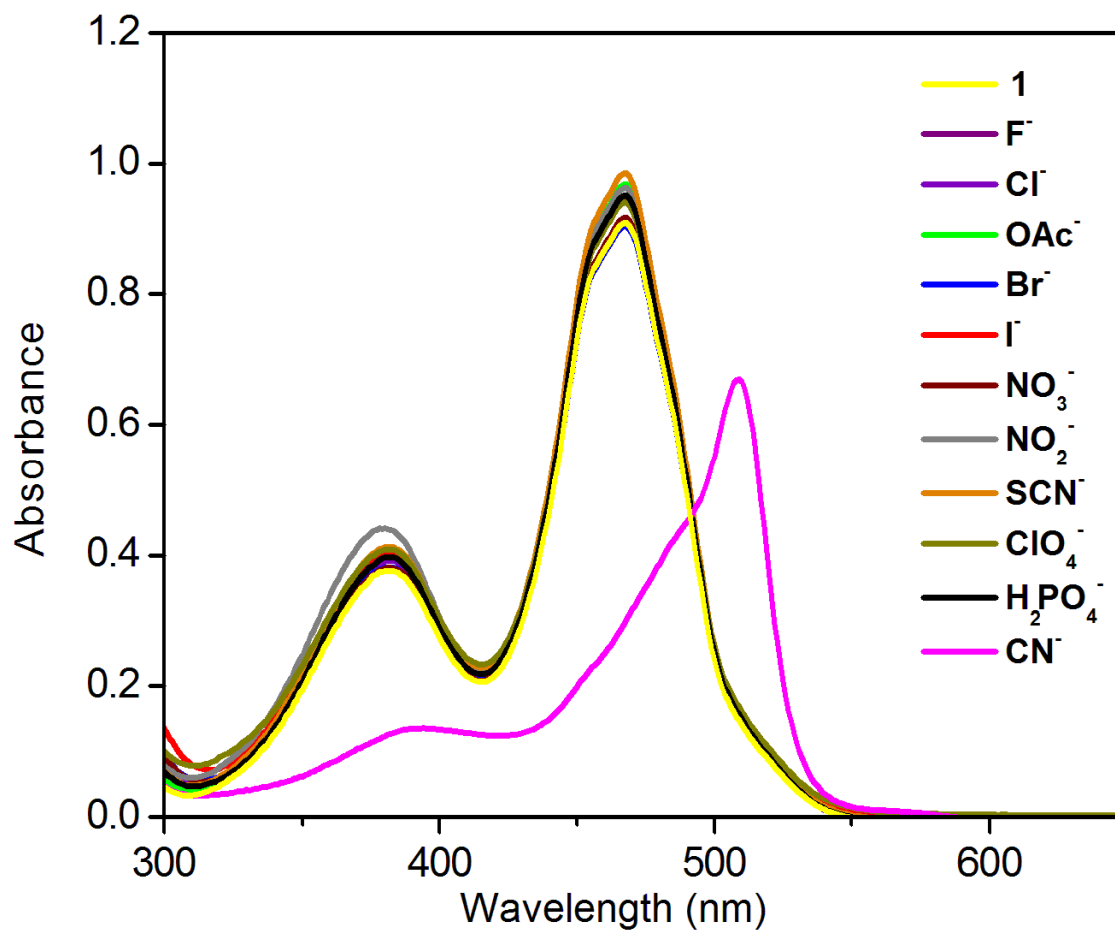

**Figure S2:** UV-vis absorption spectra of **1** in  $\text{CH}_3\text{CN}$  upon addition of various anions.

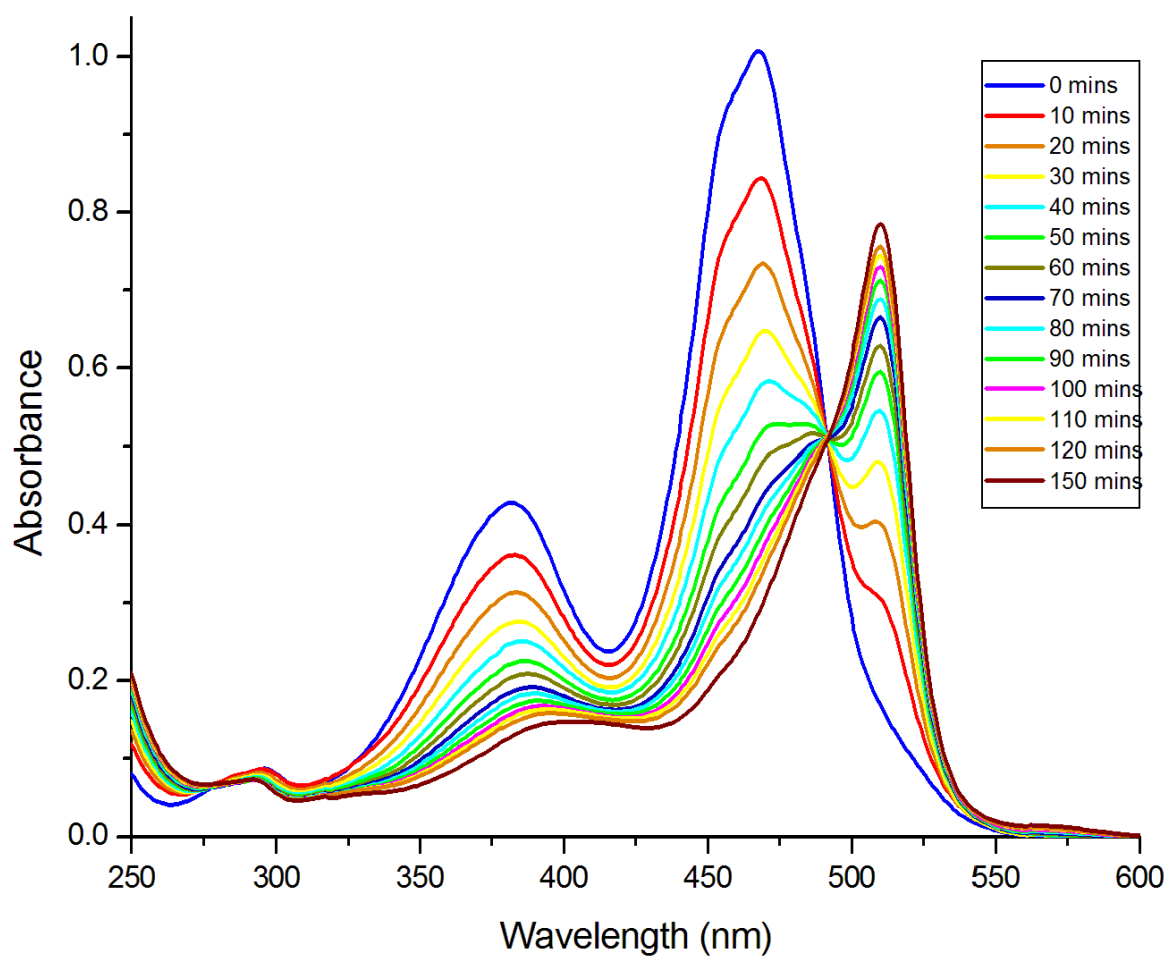

**Figure S3.** Time dependent electronic absorption spectral changes of **1** (20  $\mu\text{M}$ ) in  $\text{CH}_3\text{CN}$  upon addition of 25 equiv. of  $\text{CN}^-$ .

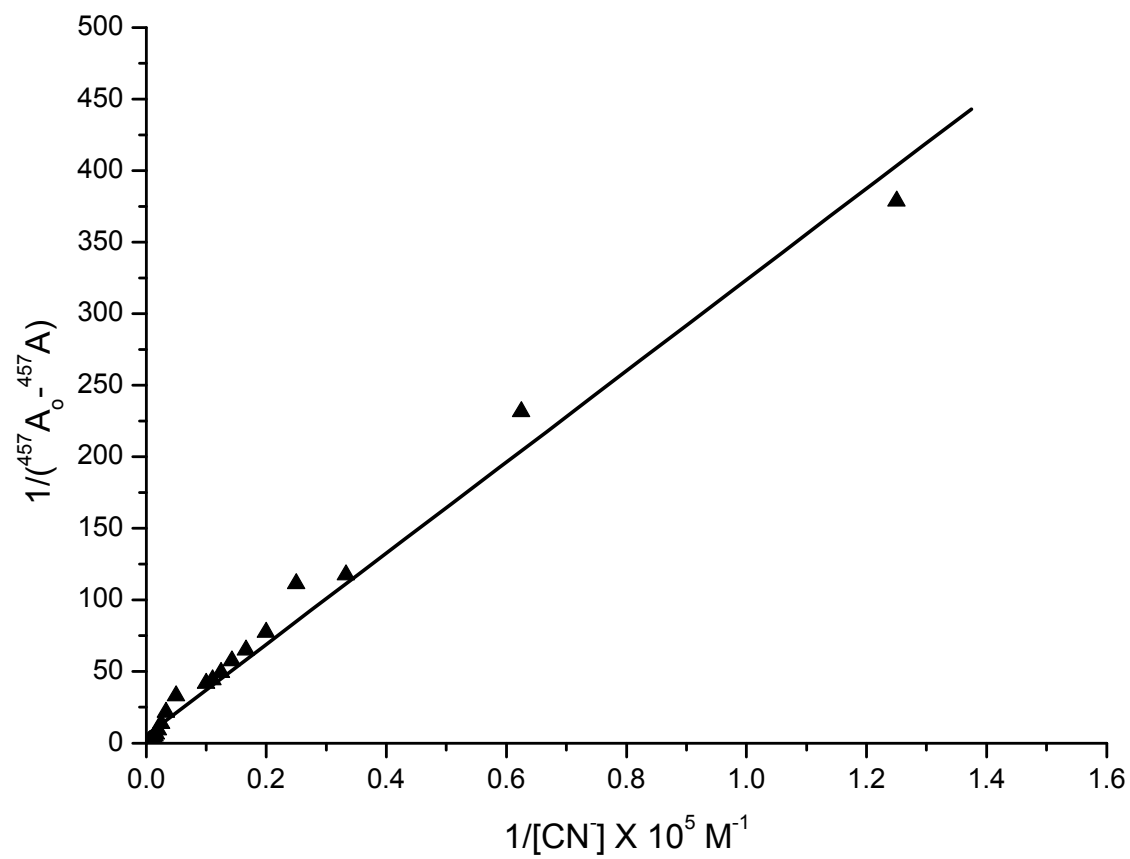

**Figure S4.** Benesi-Hildebrand plot of **1** with  $\text{CN}^-$  in  $\text{CH}_3\text{CN}$ .

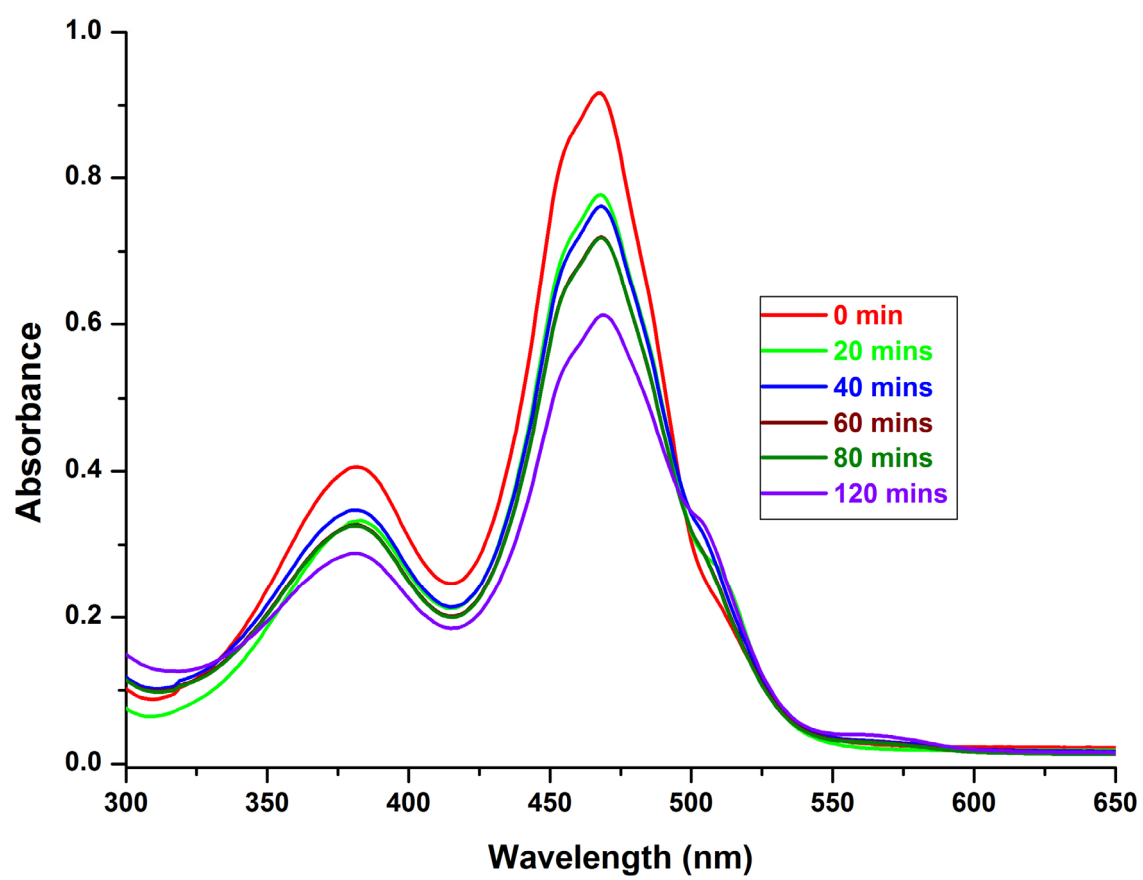

**Figure S5.** Time dependent electronic absorption spectral changes of **1** (20  $\mu\text{M}$ ) in  $\text{CH}_3\text{CN}$  upon addition of 25 equiv. of  $\text{CN}^-$  under irradiation at 310 nm.

#### 4. ESI-MS spectra of [1.CN]<sup>-</sup> adduct:

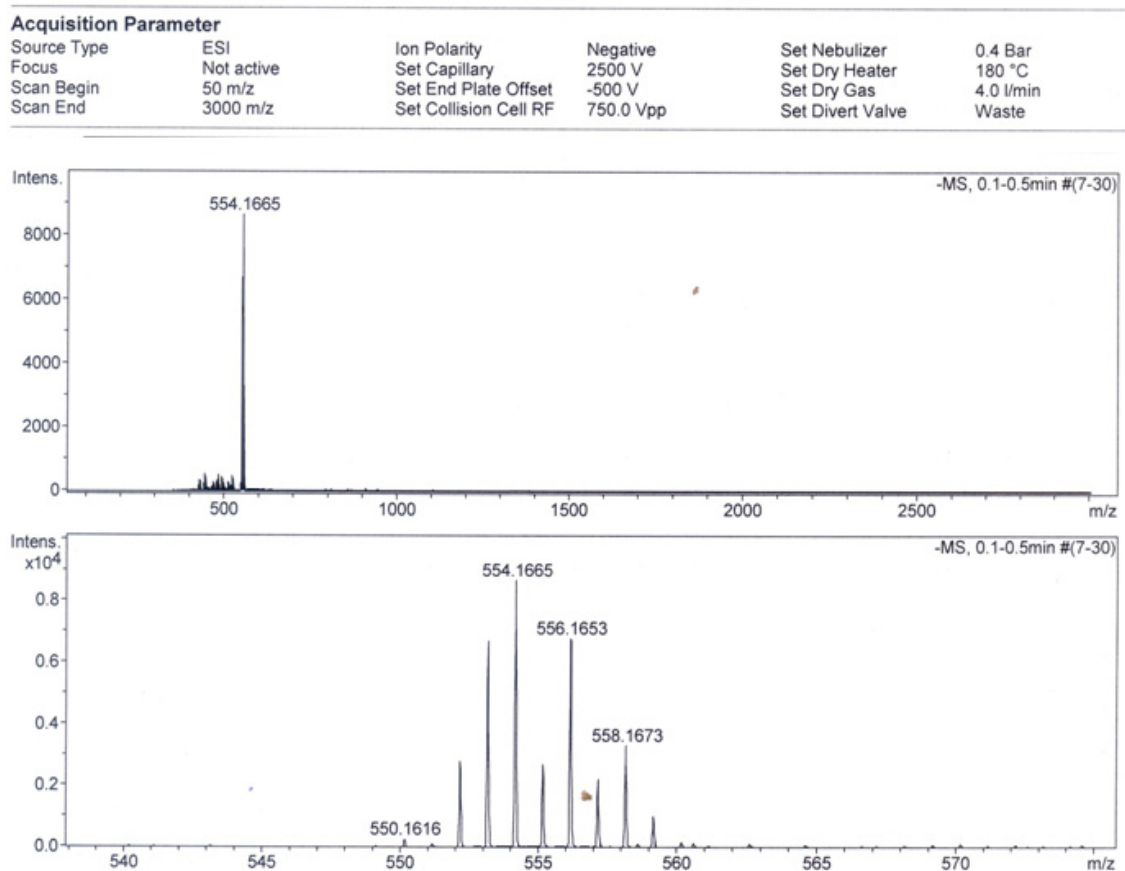

**Figure S6.** ESI-MS spectra of [1.CN]<sup>-</sup> adduct recorded in the negative mode.



## 5. Single Crystal X-ray Structure and Analysis of 1:

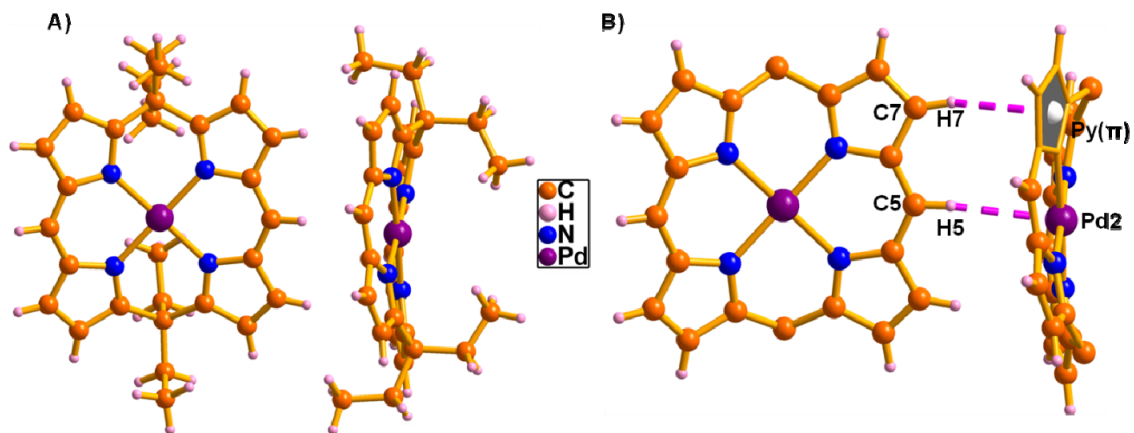

**Figure S7.** Single crystal X-ray structure of **1** by slow evaporation of  $\text{CH}_2\text{Cl}_2/n\text{-Hexane}$ . A) Top view and B) side view with intermolecular hydrogen bonding interactions. The distances and angles of  $\text{C5-H5}\dots\text{Pd2}$  and  $\text{C7-H7}\dots\text{Py}(\pi)$  are  $2.89 \text{ \AA}$ ,  $157^\circ$  and  $1.70 \text{ \AA}$ ,  $162^\circ$  respectively. The units which are not involved in the hydrogen bonding interactions are omitted for clarity in the side view.

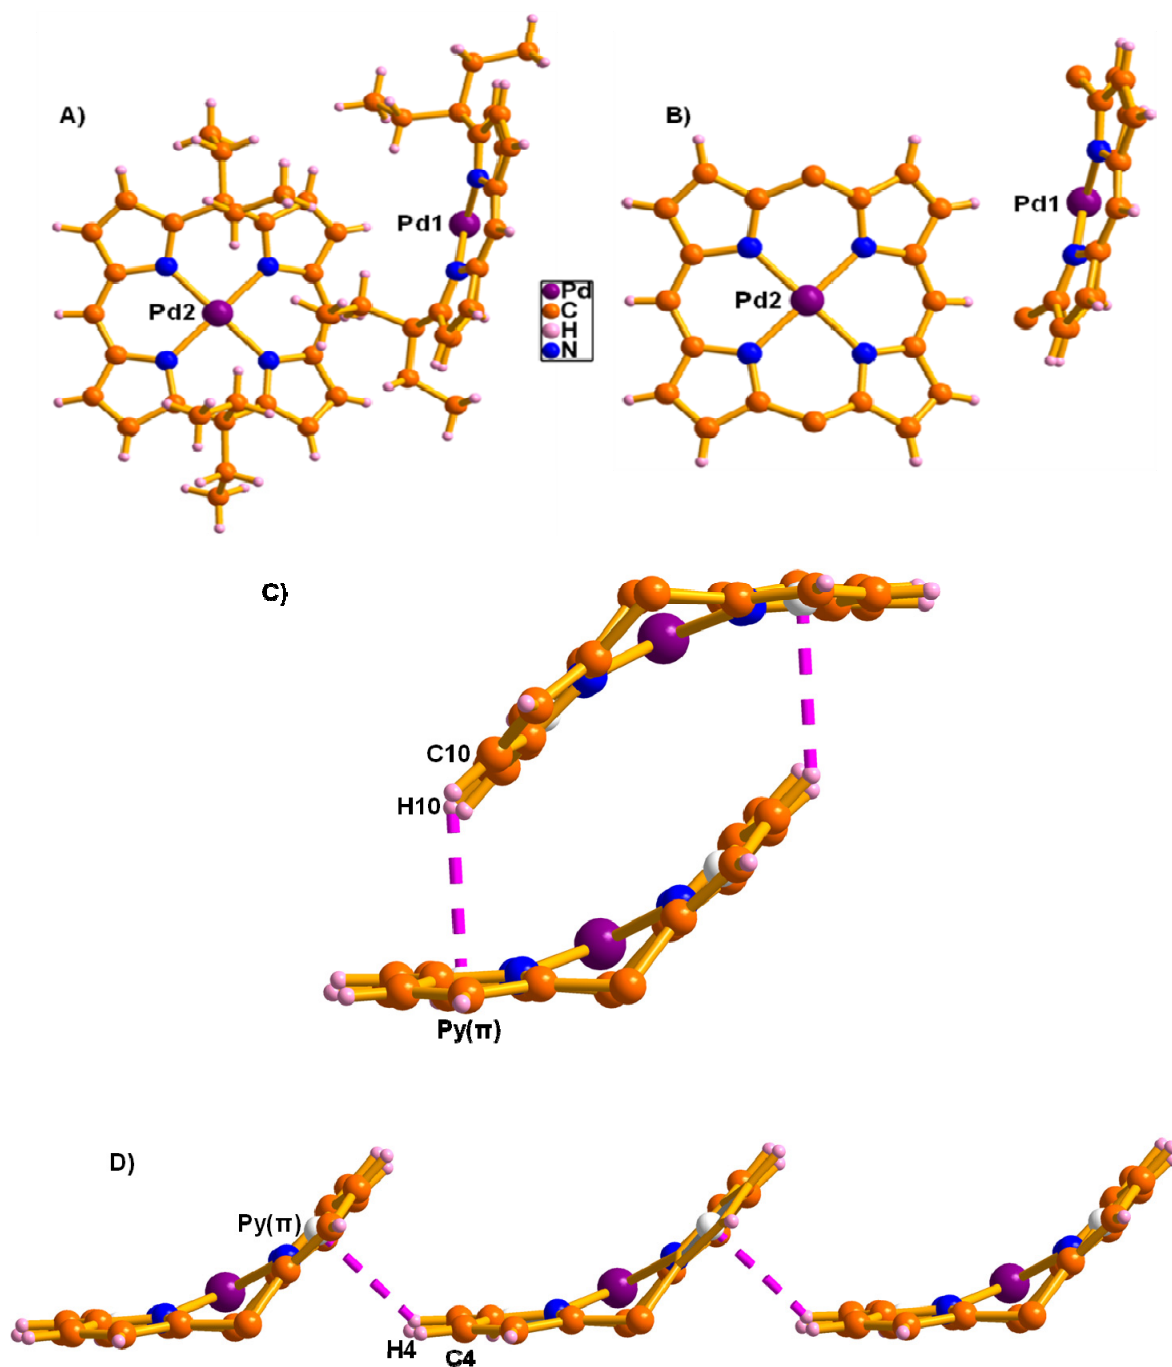

**Figure S8.** Single crystal X-ray structure of **1** by slow evaporation of  $\text{CH}_3\text{CN}/n\text{-Hexane}$ . A) Top view, B) side view, C) self-assembled dimer and D) 1-D array. The *meso*-diethyl units are omitted for clarity in the side view.

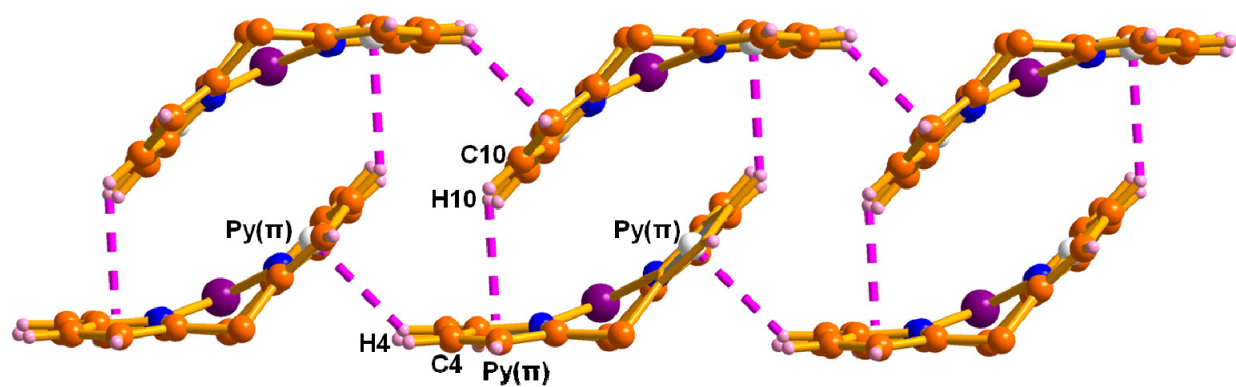

**Figure S9.** 1-D supramolecular assembly of **1** by slow evaporation of  $\text{CH}_3\text{CN}/n\text{-Hexane}$ .

## 6. Crystal data for 1:

|                                                    | <b>1</b><br>(CH <sub>2</sub> Cl <sub>2</sub> / <i>n</i> -Hexane)    | <b>1</b><br>(CH <sub>3</sub> CN/ <i>n</i> -Hexane)                  |
|----------------------------------------------------|---------------------------------------------------------------------|---------------------------------------------------------------------|
| Formula                                            | C <sub>56</sub> H <sub>60</sub> N <sub>8</sub> Pd <sub>2</sub>      | C <sub>56</sub> H <sub>60</sub> N <sub>8</sub> Pd <sub>2</sub>      |
| <i>M</i> /g mol <sup>-1</sup>                      | 1057.92                                                             | 1057.92                                                             |
| <i>T</i> /K                                        | 293(2)                                                              | 293(2)                                                              |
| Crystal dimensions/mm <sup>3</sup>                 | 0.20 x 0.05 x 0.05                                                  | 0.13 x 0.07 x 0.06                                                  |
| Crystal system                                     | Monoclinic                                                          | Triclinic                                                           |
| Space group                                        | <i>P</i> 2 <sub>1</sub> / <i>n</i>                                  | <i>P</i> -1                                                         |
| <i>a</i> /Å                                        | 16.5817(15)                                                         | 8.250(5)                                                            |
| <i>b</i> /Å                                        | 14.4709(12)                                                         | 14.764(5)                                                           |
| <i>c</i> /Å                                        | 20.188(2)                                                           | 19.582(5)                                                           |
| $\alpha$ /°                                        | 90.00                                                               | 88.932(5)                                                           |
| $\beta$ /°                                         | 99.123(5)                                                           | 89.487(5)                                                           |
| $\gamma$ /°                                        | 90.00                                                               | 74.757(5)                                                           |
| <i>V</i> /Å <sup>3</sup>                           | 4783.0(8)                                                           | 2300.8(17)                                                          |
| <i>Z</i>                                           | 4                                                                   | 2                                                                   |
| $\rho_{\text{calcd}}$ /mg m <sup>-3</sup>          | 1.469                                                               | 1.527                                                               |
| $\mu$ /mm <sup>-1</sup>                            | 0.799                                                               | 0.831                                                               |
| <i>F</i> (000)                                     | 2176                                                                | 1088                                                                |
| Reflns. collected                                  | 7299                                                                | 2704                                                                |
| Indep.reflns.[ <i>R</i> (int)]                     | 8420[0.0517]                                                        | 10568[0.0855]                                                       |
| Max/min transmission                               | 0.922 and 0.801                                                     | 0.9518 and 0.8997                                                   |
| Data/restraints/parameters                         | 8420/0/604                                                          | 10568/0/595                                                         |
| GOF on <i>F</i> <sup>2</sup>                       | 1.090                                                               | 1.002                                                               |
| Final <i>R</i> indices[ <i>I</i> > 2σ( <i>I</i> )] | <i>R</i> <sub>1</sub> = 0.0399,<br>w <i>R</i> <sub>2</sub> = 0.1004 | <i>R</i> <sub>1</sub> = 0.0493,<br>w <i>R</i> <sub>2</sub> = 0.0908 |
| <i>R</i> indices (all data)                        | <i>R</i> <sub>1</sub> = 0.0707                                      | <i>R</i> <sub>1</sub> = 0.0967                                      |
| Largest diff peak and hole [e Å <sup>-3</sup> ]    | 0.787 and -0.707                                                    | 0.783 and -0.827                                                    |

**Table S1** Crystal data for **1** (CH<sub>2</sub>Cl<sub>2</sub>/*n*-Hexane) and **1** (CH<sub>3</sub>CN/*n*-Hexane)

CCDC-930501 for **1** (CH<sub>2</sub>Cl<sub>2</sub>/*n*-Hexane) and CCDC-1006605 for **1** (CH<sub>3</sub>CN/*n*-Hexane) contain the supplementary crystallographic data for this paper. These data can be obtained free of charge from the Cambridge Crystallographic Data Centre via [www.ccdc.cam.ac.uk/data\\_request/cif](http://www.ccdc.cam.ac.uk/data_request/cif).
